# Supplementary material
Source: PubMed Central journal article supplement (PMC3654783)
Supplement: supp_blood-2008-07-171678_TableS1.pdf [file supp_blood-2008-07-171678_TableS1.pdf]

| mHag       | Gene            | rsID           | Chromosome | position <sup>†</sup>   | SNP                | mHag allele   | mHag allele frequencies in HapMap |       |       |                     | Reporter <sup>#</sup>                                      |
|------------|-----------------|----------------|------------|-------------------------|--------------------|---------------|-----------------------------------|-------|-------|---------------------|------------------------------------------------------------|
|            |                 |                |            |                         |                    |               | JPT                               | CHB   | YRI   | CEU                 |                                                            |
| HA-2       | <i>MYO1G</i>    | not registered | 7p13-p11.2 | 44,784,788              | G / A              | G             | -                                 | -     | -     | ~0.776 <sup>§</sup> | den Haan (1995) <sup>1</sup>                               |
| HA-1       | <i>HMHA1</i>    | rs1801284      | 19p13.3    | 1,019,738               | A / G              | A             | 0.367 <sup>§</sup>                | -     | -     | 0.443 <sup>§</sup>  | den Haan (1998) <sup>2</sup>                               |
| HB-1       | <i>HMHB1</i>    | rs161557*      | 5q31.3     | 143,180,246             | C / T              | bidirectional | 0.534                             | 0.578 | 0.717 | 0.858               | Dolstra (1999) <sup>3</sup><br>Dolstra (2002) <sup>4</sup> |
| HA-8       | <i>KIAA0020</i> | rs2173904 *    | 9p22.3     | 2,818,765               | G / C              | G             | 0.557                             | 0.567 | 0.558 | 0.533               | Brickner (2001) <sup>5</sup>                               |
| HA-3       | <i>AKAP13</i>   | rs2061821 *    | 15q24-q25  | 83,923,658              | C / T              | C             | 0.602                             | 0.544 | 0.608 | 0.667               | Spierings (2003) <sup>6</sup>                              |
| UGT2B17    | <i>UGT2B17</i>  | NA             | 4q13       | 69,262,482 <sup>†</sup> | deletion           | NA            | -                                 | -     | -     | -                   | Murata (2003) <sup>7</sup>                                 |
| ACC-1      | <i>BCL2A1</i>   | rs1138357 *    | 15q25.3    | 78,050,461              | A / G              | bidirectional | 0.534                             | 0.5   | 0.217 | 0.25                | Akatsuka (2003) <sup>8</sup><br>Kawase (2008) <sup>9</sup> |
| ACC-2      | <i>BCL2A1</i>   | rs3826007 *    | 15q25.3    | 78,050,272              | A / G              | A             | 0.216                             | 0.189 | 0.033 | 0.25                | Akatsuka (2003) <sup>8</sup>                               |
| LRH-1      | <i>P2RX5</i>    | rs5818907      | 17p13.3    | 3,541,026               | C / - <sup>¶</sup> | +C            | -                                 | -     | -     | 0.322 <sup>§</sup>  | de Rijike (2005) <sup>10</sup>                             |
| CTL-7A7    | <i>CEMPM</i>    | rs5758511*     | 22q13.2    | 40,660,672              | T / C              | T             | 0.398                             | 0.511 | 0     | 0.258               | Brickner (2006) <sup>11</sup>                              |
| ACC-3, -4  | <i>CTSH</i>     | rs2289702      | 15q24-q25  | 77,024,348              | A / G              | A             | 0.0566 <sup>§</sup>               | -     | -     | -                   | Torikai (2006) <sup>12</sup>                               |
| RDR173     | <i>ECGF1</i>    | not registered | 22q13.33   | 49,254,398              | A / G              | A             | -                                 | -     | -     | 0.0566 <sup>§</sup> | Slager (2006) <sup>13</sup>                                |
| DNR-7      | <i>SP110</i>    | rs1365776*     | 2q37.1     | 230,898,214             | A / G              | A             | 0.911                             | 0.889 | 0.975 | 0.625               | Warren (2006) <sup>14</sup>                                |
| LB-ADIR-1F | <i>TOR3A</i>    | rs2296377*     | 1q25.2     | 175,782,957             | T / C              | T             | 0.293                             | 0.233 | 0     | 0.213               | van Bergen (2007) <sup>15</sup>                            |
| ACC-6      | <i>HMSD</i>     | rs9945924*     | 18q21.33   | 59,771,746              | A / G              | A             | 0.211                             | 0.211 | 0.467 | 0.217               | Kawase (2007) <sup>16</sup>                                |

<sup>†</sup> Based on build 35

<sup>#</sup> References are listed in the Supplementary Materials

<sup>‡</sup> First base of the epitope

\* Included in the Phase II HapMap set

<sup>§</sup> Data deduced from the original reports based on Hardy-Weinberg equilibrium.

<sup>¶</sup> Frameshift is caused by a cytosine deletion polymorphism.

NA, not applicable
