# Supplementary material
Source: PubMed Central journal article supplement (PMC3654783)
Supplement: supp_blood-2008-07-171678_TableS2.pdf [file supp_blood-2008-07-171678_TableS2.pdf]

| SNP ID         | SNPs  | Chr | Position†  | $\chi^2$ value | Nominal p value         | mHag-associated allele | Concordance            |                        |
|----------------|-------|-----|------------|----------------|-------------------------|------------------------|------------------------|------------------------|
|                |       |     |            |                |                         |                        | mHag <sup>+</sup> pool | mHag <sup>-</sup> pool |
| <b>CTL-4B1</b> |       |     |            |                |                         |                        |                        |                        |
| rs10421359     | G / T | 19  | 1,021,991  | 52.8185        | $3.658 \times 10^{-13}$ | G                      | 20 / 21                | 36 / 36                |
| rs2242436      | C / T | 19  | 1,016,945  | 35.5298        | $2.512 \times 10^{-9}$  | T                      | 19 / 21                | 33 / 37                |
| rs2279796      | A / G | 19  | 1,010,004  | 34.9318        | $3.415 \times 10^{-9}$  | G                      | 18 / 21                | 34 / 37                |
| rs3752243      | A / G | 19  | 1,005,060  | 34.1305        | $5.154 \times 10^{-9}$  | G                      | 18 / 21                | 33 / 36                |
| rs2269848      | C / T | 19  | 1,027,063  | 33.8236        | $6.034 \times 10^{-9}$  | C                      | 20 / 21                | 31 / 37                |
| rs881768       | A / G | 19  | 1,007,065  | 31.9248        | $1.603 \times 10^{-8}$  | G                      | 18 / 21                | 33 / 37                |
| rs3752242      | A / G | 19  | 1,004,677  | 31.1473        | $2.392 \times 10^{-8}$  | A                      | 18 / 21                | 32 / 36                |
| rs3829687      | C / T | 19  | 1,004,299  | 30.1210        | $4.059 \times 10^{-8}$  | T                      | 16 / 19                | 31 / 34                |
| <b>CTL-3B6</b> |       |     |            |                |                         |                        |                        |                        |
| rs3027952      | A / G | 19  | 51,983,410 | 50.0000        | $1.537 \times 10^{-12}$ | A                      | 36 / 36                | 14 / 14                |
| rs12981126     | C / T | 19  | 51,991,975 | 40.6015        | $1.867 \times 10^{-10}$ | T                      | 36 / 36                | 12 / 14                |
| rs3848528      | G / T | 19  | 51,909,941 | 40.5715        | $1.896 \times 10^{-10}$ | G                      | 35 / 36                | 13 / 14                |
| rs7507695      | A / G | 19  | 51,992,492 | 40.5715        | $1.896 \times 10^{-10}$ | G                      | 35 / 36                | 13 / 14                |
| rs149531       | C / T | 19  | 51,998,120 | 40.5715        | $1.896 \times 10^{-10}$ | T                      | 35 / 36                | 13 / 14                |
| rs312184       | A / G | 19  | 52,002,610 | 40.5715        | $1.896 \times 10^{-10}$ | A                      | 35 / 36                | 13 / 14                |
| rs312183       | A / G | 19  | 52,000,506 | 37.0385        | $1.158 \times 10^{-9}$  | A                      | 31 / 32                | 13 / 14                |
| rs314663       | C / G | 19  | 51,893,390 | 36.5835        | $1.463 \times 10^{-9}$  | G                      | 34 / 36                | 13 / 14                |
| rs588712       | A / C | 19  | 51,909,754 | 36.5835        | $1.463 \times 10^{-9}$  | A                      | 34 / 36                | 13 / 14                |
| rs313835       | C / T | 19  | 51,972,629 | 36.5835        | $1.463 \times 10^{-9}$  | C                      | 34 / 36                | 13 / 14                |
| rs314676       | C / T | 19  | 51,888,264 | 35.7508        | $2.242 \times 10^{-9}$  | T                      | 33 / 35                | 13 / 14                |
| rs12609914     | A / G | 19  | 51,996,254 | 35.7508        | $2.242 \times 10^{-9}$  | A                      | 33 / 35                | 13 / 14                |
| rs313842       | C / T | 19  | 51,916,157 | 35.2214        | $2.943 \times 10^{-9}$  | C                      | 34 / 36                | 12 / 13                |
| rs2016824      | A / G | 19  | 51,992,746 | 34.9164        | $3.442 \times 10^{-9}$  | A                      | 32 / 34                | 13 / 14                |
| rs12609920     | A / C | 19  | 51,902,699 | 34.4045        | $4.477 \times 10^{-9}$  | C                      | 33 / 35                | 12 / 13                |
| rs314659       | A / G | 19  | 51,865,467 | 33.0948        | $8.777 \times 10^{-9}$  | A                      | 33 / 36                | 13 / 14                |
| rs3859426      | C / T | 19  | 51,875,256 | 33.0948        | $8.777 \times 10^{-9}$  | T                      | 33 / 36                | 13 / 14                |
| rs12461093     | C / G | 19  | 51,877,759 | 33.0948        | $8.777 \times 10^{-9}$  | G                      | 33 / 36                | 13 / 14                |
| rs313852       | A / G | 19  | 51,979,009 | 31.7469        | $1.756 \times 10^{-8}$  | G                      | 35 / 36                | 11 / 14                |
| rs8105903      | A / C | 19  | 51,979,990 | 31.7469        | $1.756 \times 10^{-8}$  | A                      | 35 / 36                | 11 / 14                |
| rs314662       | G / T | 19  | 51,862,484 | 30.0173        | $4.282 \times 10^{-8}$  | T                      | 32 / 36                | 13 / 14                |
| <b>CTL-1B2</b> |       |     |            |                |                         |                        |                        |                        |
| rs13144491     | C / T | 4   | 69,273,573 | 44.0000        | $3.284 \times 10^{-11}$ | T                      | 13 / 13                | 31 / 31                |
| rs3100645      | G / T | 4   | 69,671,954 | 44.0000        | $3.284 \times 10^{-11}$ | T                      | 13 / 13                | 31 / 31                |
| rs13348005     | A / T | 4   | 69,293,542 | 44.0000        | $3.284 \times 10^{-11}$ | A                      | 13 / 13                | 31 / 31                |
| rs10034124     | G / T | 4   | 69,222,280 | 42.0000        | $9.127 \times 10^{-11}$ | G                      | 13 / 13                | 29 / 29                |
| rs11732803     | A / T | 4   | 69,253,159 | 30.8597        | $2.774 \times 10^{-8}$  | A                      | 10 / 13                | 31 / 31                |
| rs7435827      | A / G | 4   | 69,243,710 | 30.8597        | $2.774 \times 10^{-8}$  | G                      | 10 / 13                | 31 / 31                |
| rs7442348      | C / T | 4   | 69,253,957 | 30.8597        | $2.774 \times 10^{-8}$  | C                      | 10 / 13                | 31 / 31                |
| rs7434408      | A / G | 4   | 69,248,036 | 28.6364        | $8.733 \times 10^{-8}$  | G                      | 9 / 12                 | 30 / 30                |

† Build35
