# Supplementary material
Source: PubMed Central journal article supplement (PMC3654783)
Supplement: supp_blood-2008-07-171678_TableS3.pdf [file supp_blood-2008-07-171678_TableS3.pdf]

| SNP ID           | SNPs         | Chr       | Position         | Locations                   | $\chi^2$ value | mHag-associated allele | Concordance            |                        | HapMap individuals |       |       |       |       |       |       |       |       |       |       |       |       |       |       |       |       |       |       |       |       |       |       |       |       |       |       |       |       |       |       |       |       |       |       |       |       |       |       |       |       |       |       |       |       |       |       |       |       |       |       |       |       |       |       |       |       |       |    |    |    |    |    |   |   |   |   |   |   |   |   |   |   |   |   |   |   |   |
|------------------|--------------|-----------|------------------|-----------------------------|----------------|------------------------|------------------------|------------------------|--------------------|-------|-------|-------|-------|-------|-------|-------|-------|-------|-------|-------|-------|-------|-------|-------|-------|-------|-------|-------|-------|-------|-------|-------|-------|-------|-------|-------|-------|-------|-------|-------|-------|-------|-------|-------|-------|-------|-------|-------|-------|-------|-------|-------|-------|-------|-------|-------|-------|-------|-------|-------|-------|-------|-------|-------|-------|-------|----|----|----|----|----|---|---|---|---|---|---|---|---|---|---|---|---|---|---|---|
|                  |              |           |                  |                             |                |                        | mHag <sup>+</sup> pool | mHag <sup>-</sup> pool | 18524              | 18526 | 18529 | 18532 | 18537 | 18540 | 18542 | 18545 | 18547 | 18550 | 18552 | 18555 | 18558 | 18561 | 18562 | 18563 | 18564 | 18566 | 18570 | 18571 | 18572 | 18573 | 18577 | 18579 | 18582 | 18592 | 18593 | 18594 | 18603 | 18940 | 18942 | 18943 | 18944 | 18945 | 18947 | 18948 | 18949 | 18951 | 18952 | 18953 | 18956 | 18959 | 18960 | 18961 | 18964 | 18965 | 18966 | 18967 | 18968 | 18969 | 18970 | 18971 | 18972 | 18973 | 18974 | 18975 | 18978 | 18980 |    |    |    |    |    |   |   |   |   |   |   |   |   |   |   |   |   |   |   |   |
| rs3829687        | C / T        | 19        | 1,004,299        | <i>ABCA7</i> , intron 22    | 30.1210        | T                      | 16 / 19                | 31 / 34                | CT                 | CT    | TT    | CT    | CC    | CC    | CC    | TT    | NN    | CT    | CC    | CT    | CT    | TT    | NN    | CT    | CT    | CT    | CT    | CT    | CT    | CC    | CC    | CT    | CC    | CT    | CC    | TT    | CT    | CC    | GT    | CC    | TT    | CC    | CT    | CT    | CC    | TT    | TT    | CC    | NN    | CC    | CT    | CC    | CT    | NN    | CC    | CT    | CT    | CT    | CC    | CC    |       |       |       |       |       |       |    |    |    |    |    |   |   |   |   |   |   |   |   |   |   |   |   |   |   |   |
| rs3752242        | A / G        | 19        | 1,004,677        | <i>ABCA7</i> , intron 23    | 31.1473        | A                      | 18 / 21                | 32 / 36                | AG                 | AG    | AA    | AG    | GG    | GG    | GG    | AA    | AG    | AG    | GG    | AG    | AG    | AA    | NN    | AG    | GG    | AG    | AG    | AG    | GG    | GG    | AG    | GG    | AG    | GG    | AG    | GG    | AA    | GG    | AG    | GG    | AA    | GG    | AG    | AG    | GG    | AA    | AA    | GG    | GG    | GG    | AG    | GG    | AG    | AG    | GG    | AG    | AG    | GG    | GG    | GG    | GG    |       |       |       |       |       |    |    |    |    |    |   |   |   |   |   |   |   |   |   |   |   |   |   |   |   |
| rs3752243        | A / G        | 19        | 1,005,060        | <i>ABCA7</i> , exon 25      | 34.1305        | G                      | 18 / 21                | 33 / 36                | AG                 | AG    | GG    | AG    | AA    | AA    | AA    | GG    | AG    | AG    | AA    | AG    | AG    | GG    | NN    | AG    | AG    | AG    | AG    | AA    | GG    | GG    | AA    | AA    | AG    | AG    | AG    | AG    | AG    | AA    | AA    | AG    | AA    | GG    | AG    | AA    | AG    | AA    | GG    | AA    | AG    | AG    | AA    | GG    | GG    | AA    | AA    | AA    | AG    | AA    | AG    | AG    | AA    | AG    | AG    | AA    | AA    |       |    |    |    |    |    |   |   |   |   |   |   |   |   |   |   |   |   |   |   |   |
| rs881768         | A / G        | 19        | 1,007,065        | <i>ABCA7</i> , exon 31      | 31.9248        | G                      | 18 / 21                | 33 / 37                | AG                 | AG    | GG    | AG    | AA    | AA    | AA    | GG    | AG    | AG    | AA    | AG    | AG    | GG    | GG    | AG    | AA    | AG    | AG    | AA    | GG    | GG    | AA    | AA    | AG    | AG    | AG    | AG    | AG    | AA    | AA    | AG    | AA    | AG    | AA    | AG    | AA    | GG    | AA    | AG    | AG    | AA    | GG    | GG    | AA    | AA    | AA    | AG    | AA    | AG    | AG    | AA    | AG    | AG    | AA    | AA    | AA    |       |    |    |    |    |    |   |   |   |   |   |   |   |   |   |   |   |   |   |   |   |
| rs2279796        | A / G        | 19        | 1,010,004        | <i>ABCA7</i> , intron 38    | 34.9318        | G                      | 18 / 21                | 34 / 37                | AG                 | AG    | GG    | AG    | AA    | AA    | AA    | GG    | AG    | AG    | AA    | AG    | AG    | GG    | GG    | AG    | AG    | AG    | AG    | AA    | GG    | GG    | AA    | AA    | AG    | AG    | AG    | AG    | AG    | AA    | AA    | AG    | AA    | GG    | AG    | AA    | AG    | AA    | GG    | AA    | AG    | AG    | AA    | GG    | GG    | AA    | AA    | AA    | AG    | AA    | AG    | AG    | AA    | AG    | AG    | AA    | AA    | AA    |    |    |    |    |    |   |   |   |   |   |   |   |   |   |   |   |   |   |   |   |
| rs2242436        | C / T        | 19        | 1,016,945        | Near <i>ABCA7</i> 3' end    | 35.5298        | T                      | 19 / 21                | 33 / 37                | CT                 | CT    | TT    | CT    | CC    | CC    | CC    | GT    | CT    | CT    | CC    | CT    | CT    | TT    | TT    | CT    | CC    | CT    | CT    | CC    | TT    | TT    | CC    | CC    | CT    | CT    | CT    | CT    | CT    | CC    | CC    | CT    | CC    | CT    | CT    | CC    | CC    | TT    | CC    | CT    | CT    | CC    | TT    | CT    | CC    | CC    | CC    | CT    | CC    | CT    | CT    | CC    | CT    | CT    | CC    | CC    |       |       |    |    |    |    |    |   |   |   |   |   |   |   |   |   |   |   |   |   |   |   |
| <b>rs1801284</b> | <b>A / G</b> | <b>19</b> | <b>1,019,738</b> | <b><i>HMHA1</i>, exon 2</b> | NA             | A                      | NA                     | NA                     | AG                 | AA    | AA    | AG    | AG    | GG    | GG    | GG    | AG    | AG    | AG    | AG    | AG    | AA    | AA    | AG    | AG    | AG    | AG    | GG    | AA    | AA    | GG    | GG    | AG    | AG    | AG    | AA    | AG    | GG    | GG    | GG    | AA    | GG    | AG    | AG    | AG    | AA    | AG    | GG    | GG    | GG    | AG    | GG    | AG    | AG    | GG    | AA    | AG    | AG | GG | GG |    |    |   |   |   |   |   |   |   |   |   |   |   |   |   |   |   |
| rs10421359       | G / T        | 19        | 1,021,991        | <i>HMHA1</i> , intron 2     | 52.8185        | G                      | 20 / 21                | 36 / 36                | GT                 | GG    | GG    | GT    | GT    | TT    | TT    | TT    | GT    | GT    | GT    | GT    | GT    | GG    | GG    | GT    | GG    | GT    | GT    | TT    | GG    | GG    | TT    | TT    | NN    | GT    | GT    | GG    | GT    | TT    | TT    | GT    | TT    | TT    | GT    | TT    | TT    | GG    | TT    | GT    | GT    | GT    | GG    | GT    | GT    | TT    | TT    | GT    | TT    | GT    | GT    | TT    | GG    | GT    | GT    | TT    | TT    |       |    |    |    |    |    |   |   |   |   |   |   |   |   |   |   |   |   |   |   |   |
| rs2269848        | C / T        | 19        | 1,027,063        | <i>HMHA1</i> , intron 10    | 33.8236        | C                      | 20 / 21                | 31 / 37                | CT                 | CC    | CT    | CT    | CT    | TT    | TT    | TT    | TT    | CT    | CT    | CT    | CT    | TT    | CC    | CT    | CT    | CT    | CT    | CT    | TT    | CC    | CT    | TT    | TT    | CT    | TT    | CT    | CC    | CT    | TT    | TT    | CT    | TT    | TT    | CT    | TT    | TT | TT | TT | TT | TT |   |   |   |   |   |   |   |   |   |   |   |   |   |   |   |
| Lysis by CTL-4B1 |              |           |                  |                             |                |                        |                        |                        | +                  | +     | +     | +     | +     | -     | -     | -     | +     | +     | +     | +     | +     | +     | +     | +     | +     | +     | +     | +     | +     | -     | +     | +     | -     | -     | +     | +     | +     | +     | +     | -     | -     | +     | -     | -     | -     | +     | -     | +     | +     | +     | +     | +     | -     | -     | -     | +     | -     | +     | +     | -     | +     | +     | +     | -     | -     | -     | -  | -  | -  | -  | -  | - | - | - | - | - | - | - | - | - | - | - | - | - | - | - |

† Individual B-LCLs not lysed by CTL-4B1 were highlighted in sky blue; Genotypes which were discordant with the lysis by CTL due to recombination or mutation were hatched.

¶ SNP controlling expression of 4B1-CTL
